# Supplementary material for: Pyridylamido hafnium complexes with a silylene bridge: synthesis and olefin polymerization
Source: Royal Society of Chemistry journal article supplement (doi:10.1039/d0dt01031f), 2020-01-01
Supplement: d0dt01031f1.pdf [file d0dt01031f1.pdf]

## Electronic Supporting Information

### Pyridylamido Hafnium Complexes with Silylene Bridge

Pavel S. Kulyabin<sup>a</sup>, Dmitry V. Uborsky<sup>a</sup>, Alexander Z. Voskoboynikov<sup>\*a</sup>,  
Jo Ann M. Canich<sup>b</sup>, John R. Hagadorn<sup>\*b</sup>

<sup>a</sup>Department of Chemistry, M. V. Lomonosov Moscow State University, Leninskie Gory, 1/3, Moscow 119991, Russian Federation

<sup>b</sup>Baytown Technology and Engineering Complex, ExxonMobil Chemical Company, Baytown, TX, 77520, United States

Email addresses: voskoboy@med.chem.msu.ru, john.r.hagadorn@exxonmobil.com

### Table of Contents

|                                                                                                     |           |
|-----------------------------------------------------------------------------------------------------|-----------|
| <b>General Information .....</b>                                                                    | <b>2</b>  |
| <b>Characterization of 4-methyl-1-pentene-appended Ligand of 7 Residue. ....</b>                    | <b>2</b>  |
| <b>Characterization of 4-methyl-1-pentene-appended Ligand of 8 Residue. ....</b>                    | <b>2</b>  |
| <b>1-Hexene Polymerization. ....</b>                                                                | <b>8</b>  |
| <b>Propylene homopolymerization and ethylene/1-octene copolymerization – general procedure.....</b> | <b>8</b>  |
| <b>Crystal structure determinations. ....</b>                                                       | <b>12</b> |
| <b>References.....</b>                                                                              | <b>12</b> |

## General Information

All syntheses involving air- and moisture sensitive compounds were carried out using standard Schlenk-type glassware or in a nitrogen-filled Vacuum Atmospheres glove box (<1 ppm O<sub>2</sub>). Toluene was dried and stored over 4 Å molecular sieves. 4-Methyl-1-pentene (4M1P) and 1-hexene were passed through a pad of dried alumina and stored over 4 Å molecular sieves. Toluene for polymerization experiments was distilled over sodium metal and stored over 4 Å molecular sieves. GC/MS spectra were registered with Agilent 7890A GC equipped with Agilent 5975C inert XL MSD. Gel permeation chromatograms for polyhexene samples were obtained on GPC instrument consisting of Waters 515 HPLC pump, Waters 717plus autosampler, and Polymer Laboratories PL-ELS 1000 light scattering detector using three PLGel Mixed-B columns (7.5×300 mm with 10 µm particle size). Mobile phase: THF at flow rate of 1 mL/min. Polystyrene standards produced by Polymer Standards Service GmbH were used for calibration (ReadyCal Kit Poly(styrene), M<sub>p</sub> = 7520, 2570, 1210, 579, 246, 127, 67, 34.8, 17.8, 8.4, 3.42, and 1.62 kDa).

### Characterization of 4-methyl-1-pentene-appended Ligand of **7** Residue.

Under nitrogen atmosphere in a glovebox, to a solution of **7** (600 mg, 0.803 mmol) in toluene (34 mL) in a glass vial a solution of TTB (1.48 g, 1.61 mmol, 2 equiv) in toluene (6 mL) was added at room temperature. After stirring for 5 min, 4M1P (5.1 mL, 40.2 mmol, 50 equiv) was added to the solution, which quickly became viscous with evolution of heat. The vial was taken outside the glovebox, and the reaction was quenched with excess of methanol. The precipitated polymer was collected on a frit and washed with methanol, giving white solid poly-(4M1P). The combined filtrates were evaporated to dryness, the fraction containing the insertion product was isolated by flash chromatography on silica gel (eluent: hexane/dichloromethane = 5/1) and analyzed by GC-MS (Figure S2), which revealed presence of a mixture of compounds including several peaks corresponding to 4M1P insertion products (*m/z* 239, Figure S3). The results were also compared to the GC/MS analysis of the products of decomposition of **7** with methanol: 20 mg of complex **7** were treated with 4 mL of methanol and the resulted solution was filtrated through the syringe filter (0.45 µm) and injected in the GC (Figure S1).

### Characterization of 4-methyl-1-pentene-appended Ligand of **8** Residue.

Under nitrogen atmosphere in a glovebox, to a solution of **8** (400 mg, 0.502 mmol) and 4M1P (3.2 mL, 25.1 mmol, 50 equiv) in toluene (18 mL) in a glass vial with a solution of TTB (925 mg, 1.04 mmol, 2 equiv) in toluene (10 mL), was added at room temperature. After stirring for 5 min, 4M1P (3.2 mL, 25.1 mmol, 50 equiv) was added to the solution, which quickly became viscous with evolution of heat. The vial was taken outside the glovebox, and the reaction was quenched with excess of methanol. The precipitated polymer was collected on a frit and washed with methanol, giving white solid poly-(4M1P). The combined filtrates were analyzed by GC-MS (Figure S5), which revealed presence of a mixture of compounds including several peaks corresponding to 4M1P insertion products (*m/z* 289, Figure S6). The results were also compared to the GC/MS analysis of the products of decomposition of **8** with methanol: 20 mg of complex **8** were treated with 4 mL of methanol and the resulted solution was filtrated through the syringe filter (0.45 µm) and injected in the GC (Figure S4).

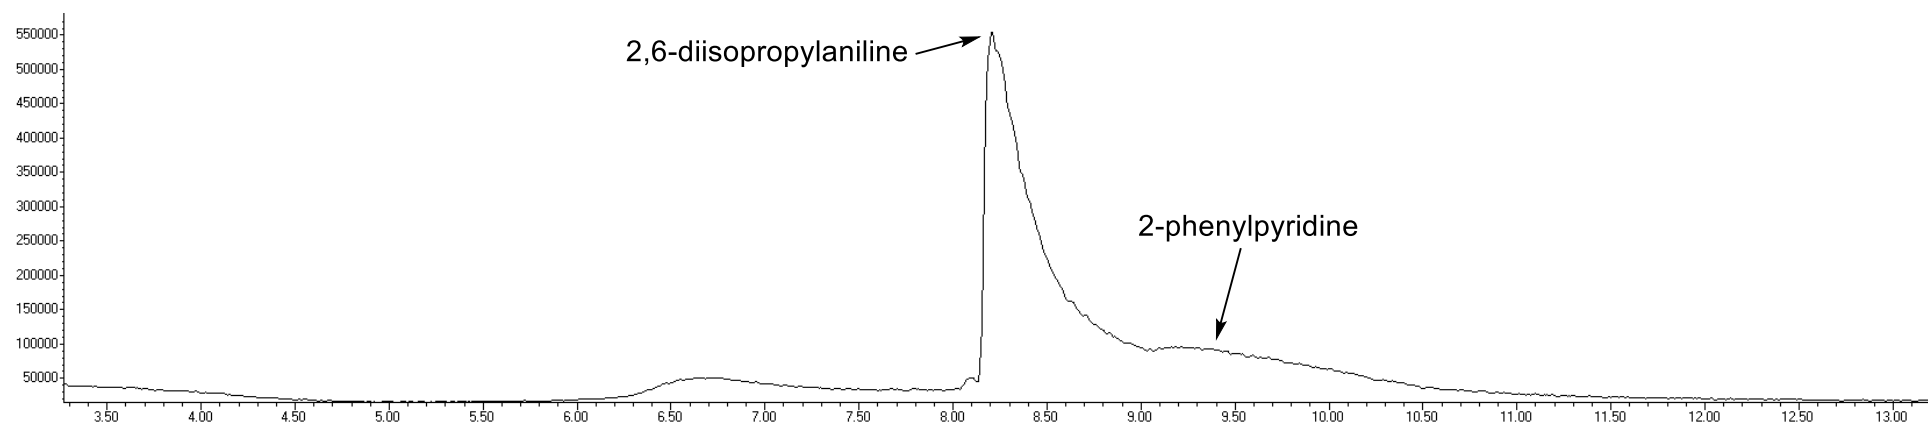

Figure S1. GC of products of decomposition of 7 with methanol.

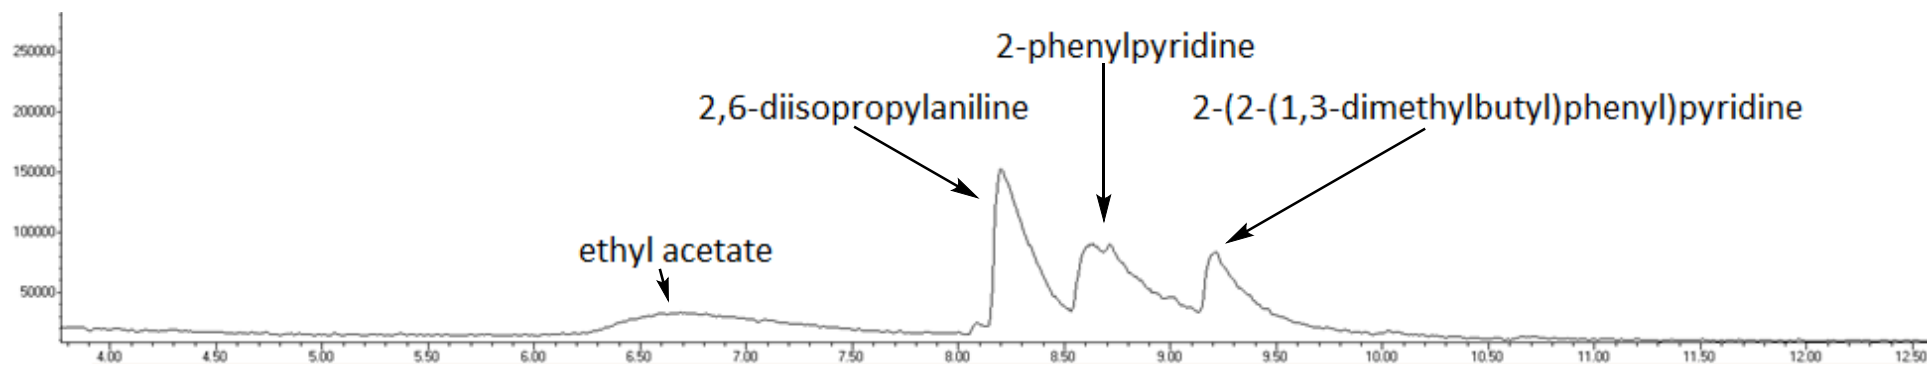

Figure S2. GC of products formed from 7 after quenching the polymerization of 4M1P on 7/TTB with methanol.

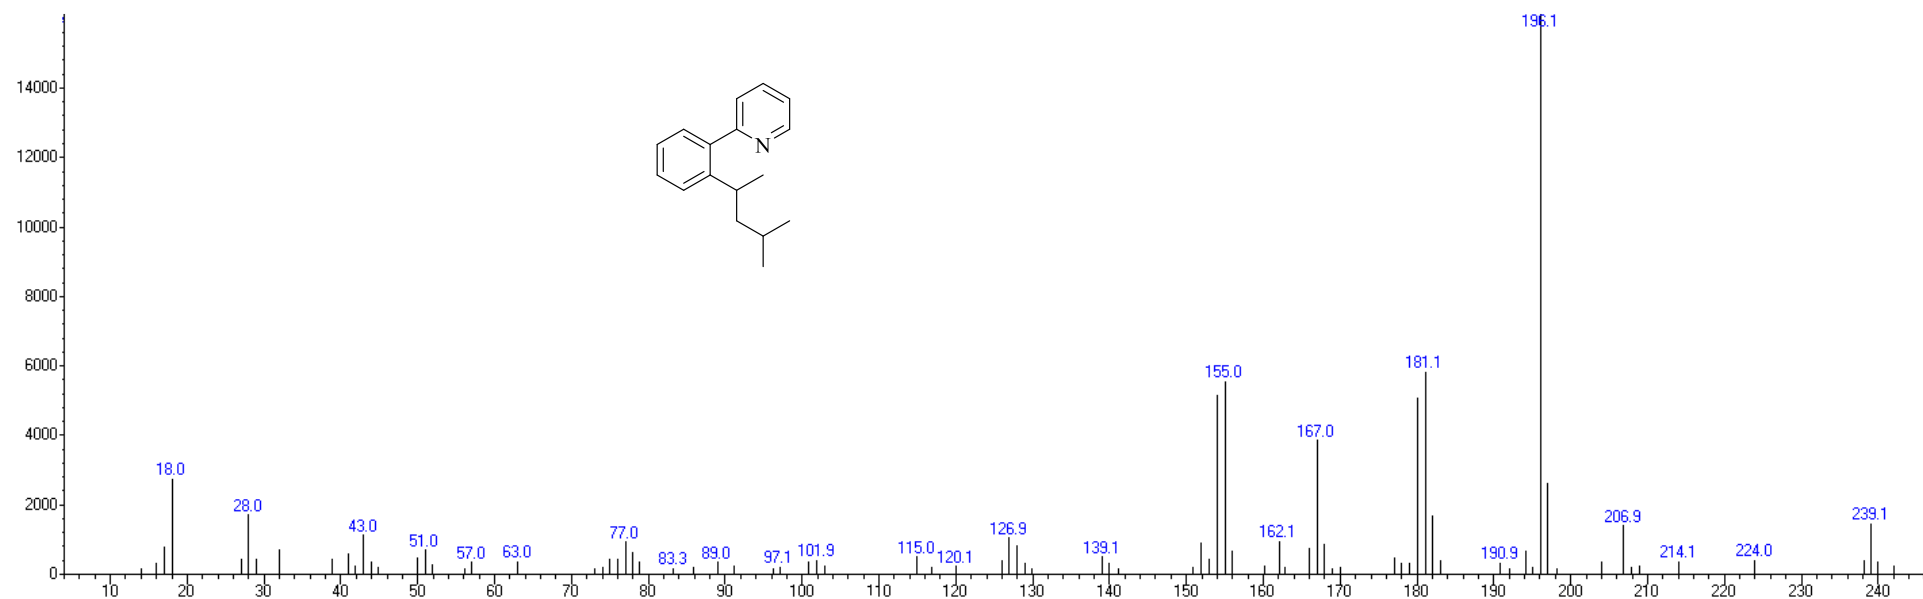

**Figure S3.** EI-MS spectrum of 2-(2-(1,3-dimethylbutyl)phenyl)pyridine formed during polymerization of 4M1P with 7/TTB.

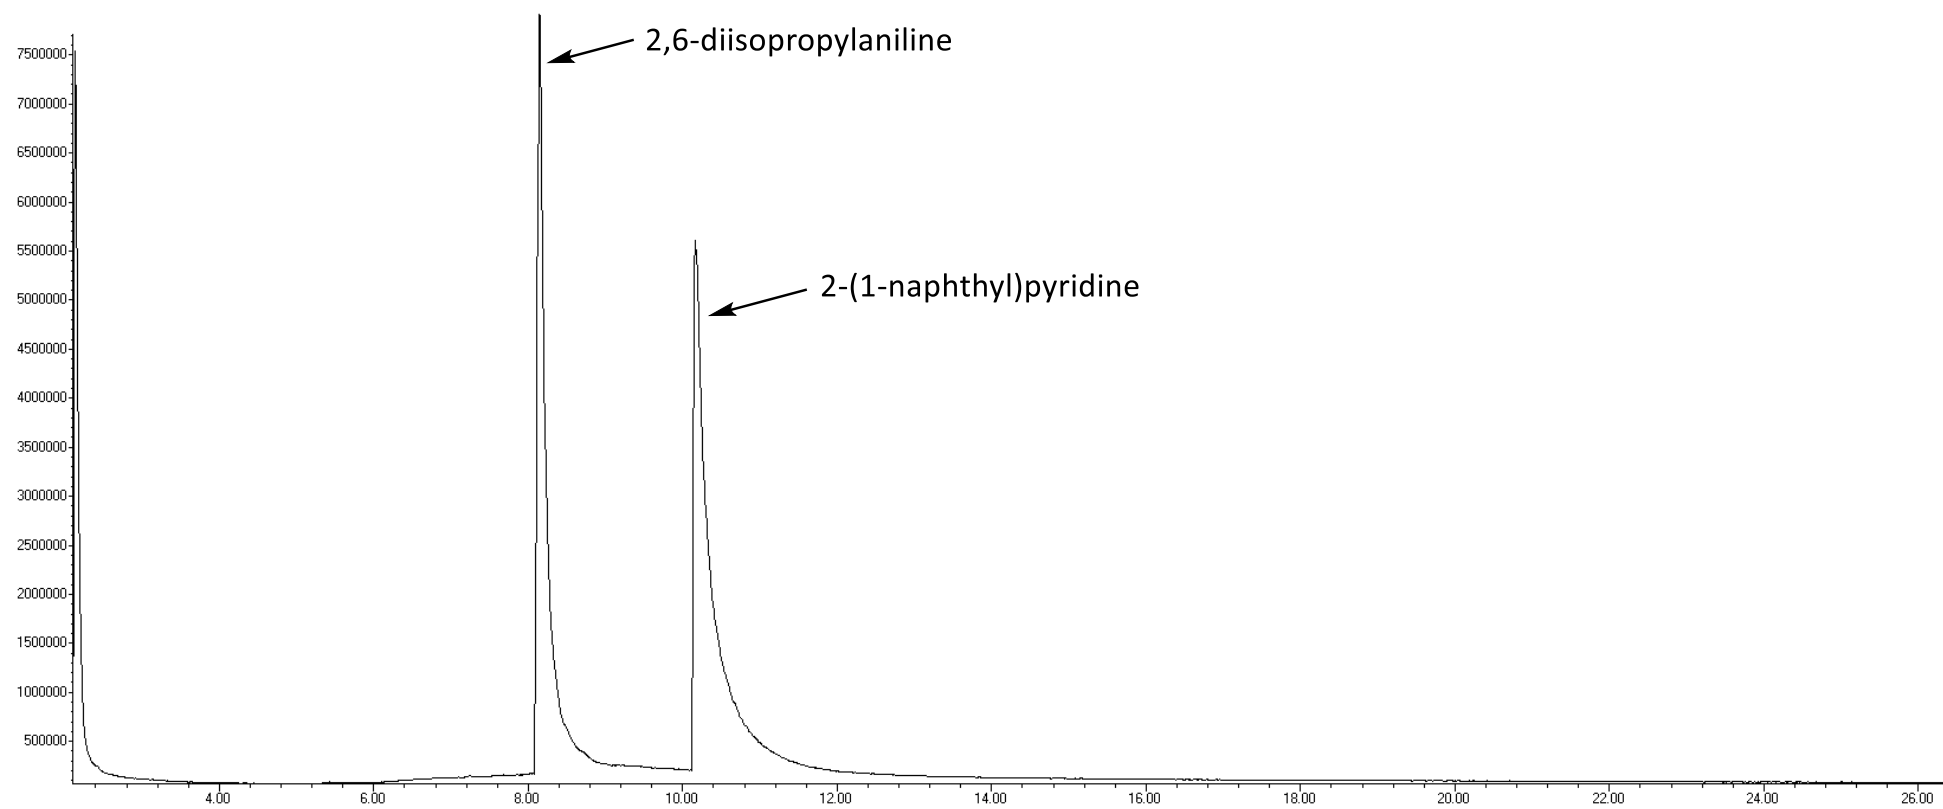

**Figure S4.** GC of products of decomposition of **8** with methanol.

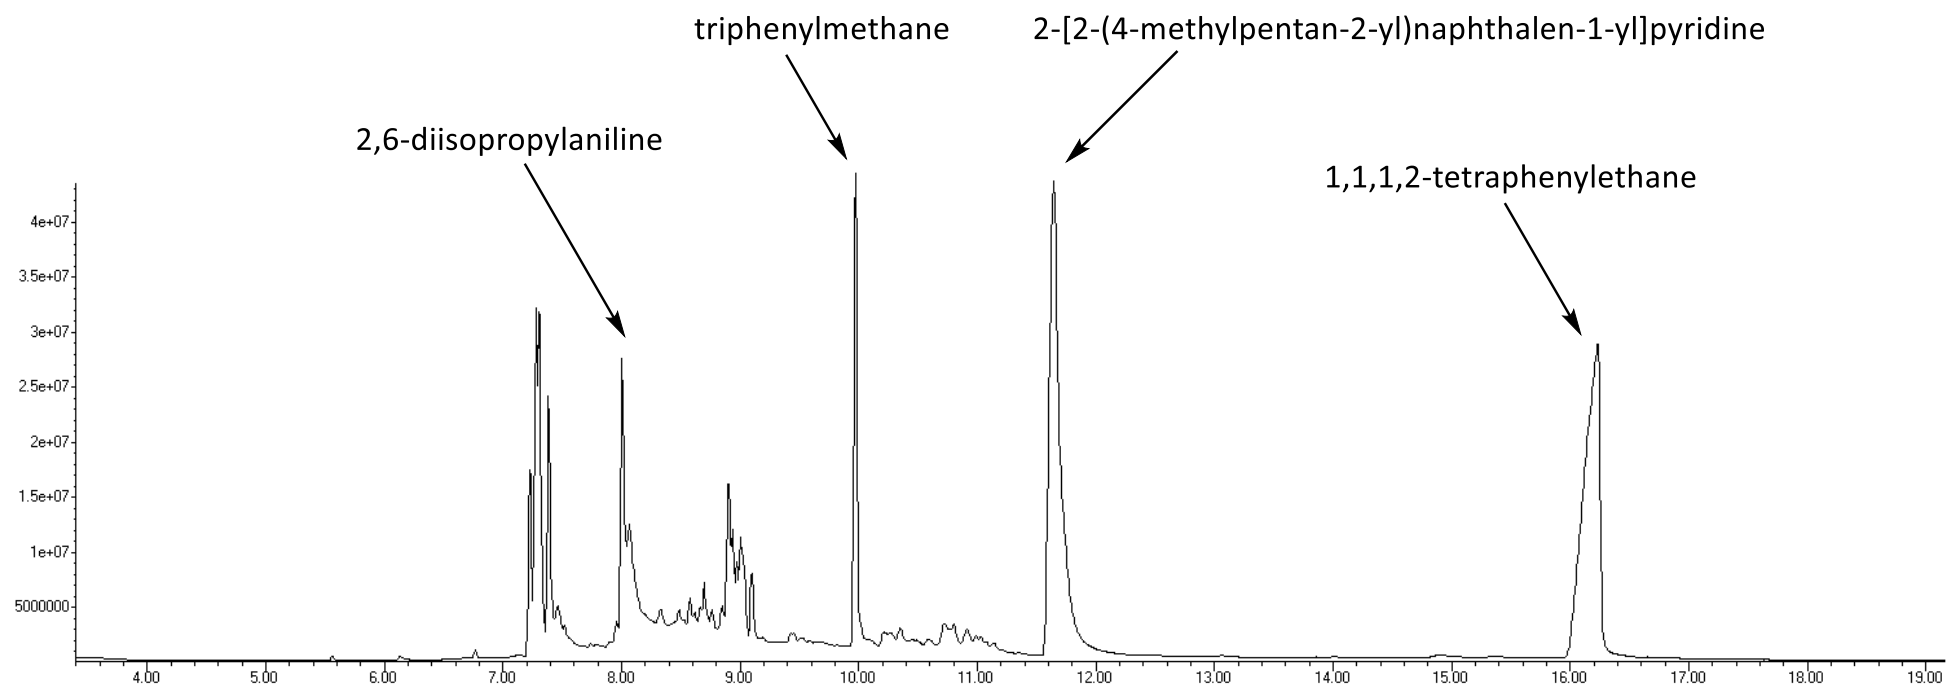

**Figure S5.** GC of products formed from **8** after quenching the polymerization of 4M1P on **8**/TTB with methanol.

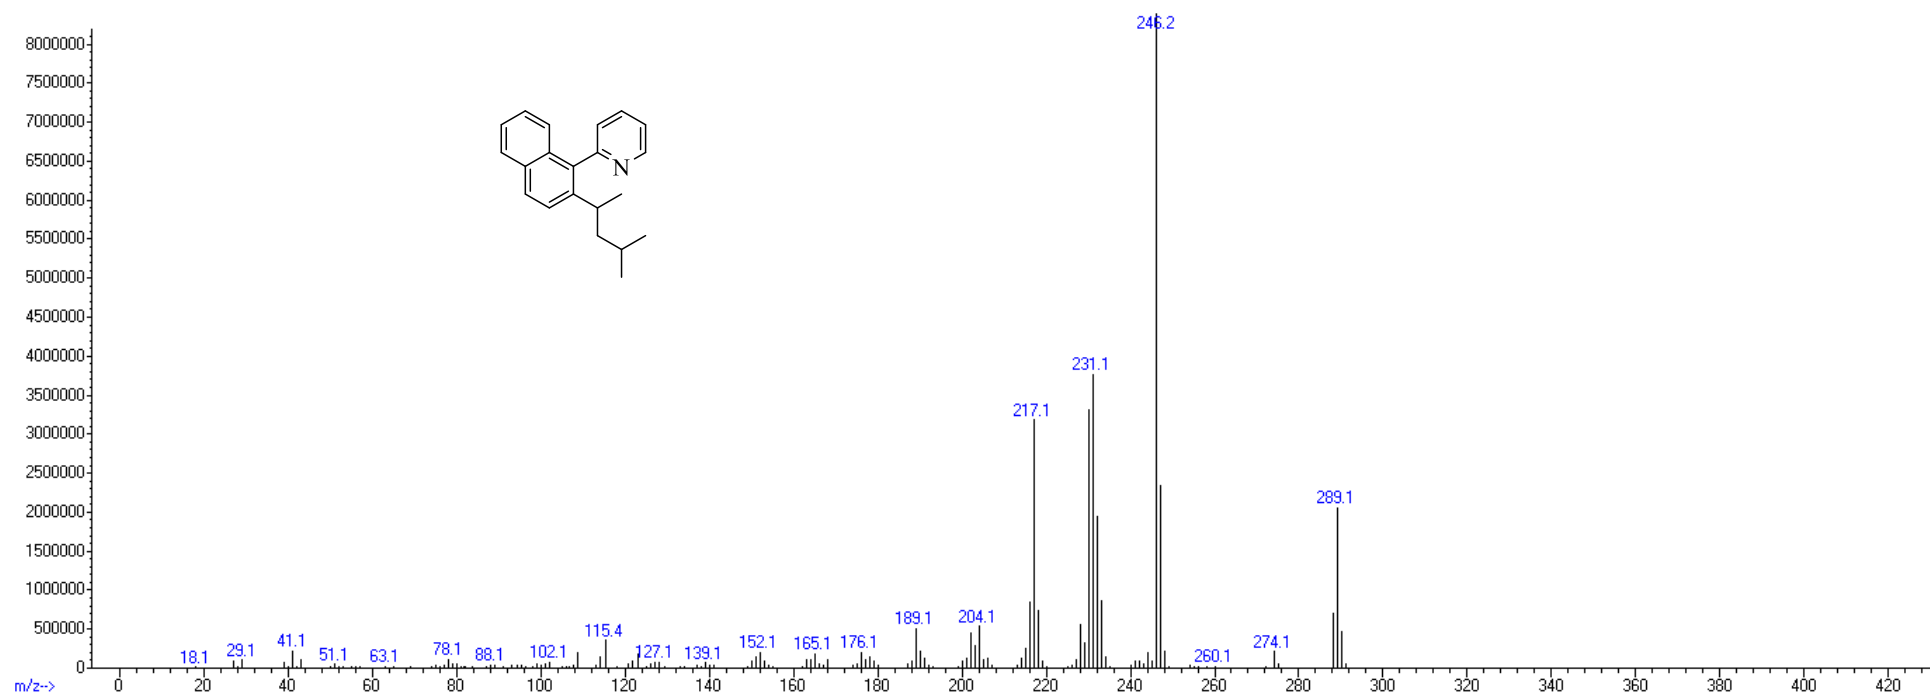

Figure S6. EI-MS spectrum of 2-(2-(4-methylpentan-2-yl)naphthalen-1-yl)pyridine formed during polymerization of 4M1P with 8/TTB.

### 1-Hexene Polymerization.

In a glovebox, a catalyst precursor was weighed into an oven-dried 40 mL vial. The vial was equipped with a stir bar, and the catalyst was dissolved in 5 mL of toluene. In entries 3–6 (Table 2) the vial was heated to 60 °C. To this solution was added 2 mL of 1-hexene. In a separate vial, activator was dissolved in 3 mL of toluene, this solution was added to the prepared solution of catalyst precursor and 1-hexene, and the reaction was allowed to proceed at the desired temperature with vigorous stirring for 30 min. The polymerization was quenched with 20 mL of acetone, and after completion of polymer coagulation, the polymer was isolated by decanting the supernatant and drying the residue to constant weight in vacuum at 70 °C.

**Table S1. 1-Hexene polymerization data for complexes 7-12 and 1c<sup>a</sup>**

| Entry | Complex   | Activator                         | T <sub>pol</sub> , °C | Yield, mg | Conversion, % | M <sub>n</sub> , <sup>b</sup> kDa | M <sub>w</sub> , <sup>b</sup> kDa | Đ <sup>b</sup>   |
|-------|-----------|-----------------------------------|-----------------------|-----------|---------------|-----------------------------------|-----------------------------------|------------------|
| 1     | <b>7</b>  | AB                                | 25                    | 370       | 27            | 18                                | 48                                | 2.6              |
| 2     | <b>8</b>  | AB                                | 25                    | 107       | 8             | 14                                | 18                                | 1.3              |
| 3     | <b>7</b>  | B(C <sub>6</sub> F <sub>5</sub> ) | 33                    | 267       | 20            | 14                                | 32                                | 2.3 <sup>e</sup> |
| 4     | <b>8</b>  | B(C <sub>6</sub> F <sub>5</sub> ) | 33                    | 1305      | 96            | 17                                | 27                                | 1.6              |
| 5     | <b>1d</b> | B(C <sub>6</sub> F <sub>5</sub> ) | 33                    | 1212      | 89            | 20                                | 43                                | 2.1              |
| 6     | <b>7</b>  | TTB                               | 33                    | 1267      | 93            | 9                                 | 119                               | 14 <sup>e</sup>  |
| 7     | <b>8</b>  | TTB                               | 33                    | 1341      | 99            | 10                                | 17                                | 1.7              |
| 8     | <b>1d</b> | TTB                               | 33                    | 1145      | 84            | 10                                | 38                                | 3.8 <sup>e</sup> |
| 9     | <b>7</b>  | AB                                | 60(±2)                | 987       | 73            | 6                                 | 8                                 | 1.4              |
| 10    | <b>8</b>  | AB                                | 60(±2)                | 522       | 38            | 11                                | 15                                | 1.3              |
| 11    | <b>7</b>  | TTB                               | 60(±2)                | 662       | 49            | 6                                 | 11                                | 1.8 <sup>e</sup> |
| 12    | <b>8</b>  | TTB                               | 60(±2)                | 865       | 64            | 7                                 | 10                                | 1.4              |

<sup>a</sup>Polymerization conditions: **7**, **8**, or **1d**, 10 μmol, [B]/[Hf] = 1.0, 8.0 mL toluene, 2.0 mL 1-hexene, 30 min.

<sup>b</sup>Determined using gel permeation chromatography in THF at 35 °C vs polystyrene standards. <sup>e</sup>Bimodal molecular weight distribution.

### Propylene homopolymerization and ethylene/1-octene copolymerization – general procedure.

A pre-weighed glass vial insert and disposable stirring paddle were fitted to each reaction vessel of the reactor. The reactor was then closed and each vessel was individually heated to the desired temperature and pressurized with nitrogen to 75 psi. For ethylene/1-octene copolymerization the reactor was then purged with ethylene and pressurized with ethylene to 75 psi. Liquid monomer, such as 1-octene or liquified propylene was then injected into each reaction vessel through a valve, followed by enough isohexane to bring the total reaction volume, including the subsequent additions, to the desired volume (5 mL). The contents of the vessel were then stirred at 800 rpm. A solution of trioctylaluminum scavenger (in isohexane) was then added along with a solvent chaser. An activator solution in toluene was then injected



into the reaction vessel along with a solvent chaser. Then a toluene solution of the precatalyst complex dissolved was added along with and a solvent chaser. The reaction was then allowed to proceed until either a set amount of pressure had been taken up by the polymerization or a time limit had been reached. At this point, the reaction was quenched by pressurizing the vessel with compressed air. After the polymerization reaction, the glass vial insert containing the polymer product and solvent was removed from the pressure cell and the inert atmosphere glove box, and the volatile components were removed using a Genevac HT-12 centrifuge and Genevac VC3000D vacuum evaporator operating at elevated temperature and reduced pressure. The vial was then weighed to determine the yield of the polymer product.

The resultant polymer was analyzed by Rapid GPC to determine the molecular weight. This apparatus has a series of three 30 cm x 7.5 mm linear columns, each containing PLgel 10  $\mu$ m, Mix B. The GPC system was calibrated using polystyrene standards ranging from 580 g/mol - 3,390,000 g/mol. The system was operated at an eluent flow rate of 2.0 mL/min and an oven temperature of 165 °C. 1,2,4-trichlorobenzene was used as the eluent. The polymer samples were dissolved in 1,2,4-trichlorobenzene at a concentration of 0.1 mg/mL - 0.9 mg/mL. 250  $\mu$ L of a polymer solution was injected into the system. The concentration of the polymer in the eluent was monitored using an evaporative light scattering detector. The molecular weights presented in the examples are relative to linear polystyrene standards.

Differential Scanning Calorimetry (DSC) measurements were performed on a TA-Q100 instrument to determine the melting point of the polymers. Samples were pre-annealed at 220 °C for 15 minutes and then allowed to cool to room temperature overnight. The samples were then heated to 220 °C at a rate of 100 °C/minutes and then cooled at a rate of 50 °C/min. Melting points were collected during the heating period.

**Table S2. Propylene Polymerization Data for Complexes 7-12 at 70 °C<sup>a</sup>**

| Entry          | Complex   | Quench Time <sup>b</sup> , s | Yield, mg | Activity, g·mmol <sup>-1</sup> ·h <sup>-1</sup> | M <sub>w</sub> <sup>c</sup> , kDa | M <sub>n</sub> <sup>c</sup> , kDa | $\bar{D}$ <sup>c</sup> | T <sub>m</sub> <sup>d</sup> , °C |
|----------------|-----------|------------------------------|-----------|-------------------------------------------------|-----------------------------------|-----------------------------------|------------------------|----------------------------------|
| 1              | <b>7</b>  | 461                          | 37        | 7220                                            | 31                                | 18                                | 1.7                    | 131                              |
| 2              | <b>8</b>  | 2701                         | 8         | 270                                             | n.d.                              | n.d.                              | n.d.                   | n.d.                             |
| 3              | <b>9</b>  | 819                          | 46        | 5060                                            | 37                                | 22                                | 1.7                    | 135                              |
| 4              | <b>10</b> | 1696                         | 43        | 2280                                            | 22                                | 10                                | 2.3                    | 138                              |
| 5              | <b>11</b> | 1310                         | 41        | 2820                                            | 21                                | 12                                | 2.4                    | 134                              |
| 6              | <b>12</b> | 1193                         | 44        | 3320                                            | 54                                | 28                                | 1.9                    | n.d.                             |
| 7 <sup>e</sup> | <b>1b</b> | 316                          | 254       | 48200                                           | 1469                              | 812                               | 1.8                    | 148                              |

<sup>a</sup>Polymerization conditions: 0.04  $\mu$ mol complexes; 0.044  $\mu$ mol AB activator; propylene = 1 mL; total volume: 5.1 mL; 3.8 mL isohexane; 0.5  $\mu$ mol of (*n*Oct)<sub>3</sub>Al; temperature: 70 °C; 800 rpm stirring speed. <sup>b</sup>Reactor quenched at 12 psig uptake (quench value, see Supporting Information for details) or at a maximum time of 45 minutes.

<sup>c</sup>Determined using gel permeation chromatography in 1,2,4-C<sub>6</sub>H<sub>3</sub>Cl<sub>3</sub> at 135 °C vs polystyrene standards.

<sup>d</sup>Determined via differential scanning calorimetry. <sup>e</sup>0.06  $\mu$ mol complex used.

**Table S3. Ethylene/1-Octene Copolymerization Data for Complexes 7-12 at 80 °C<sup>a</sup>**

| Entry          | Complex   | Quench time, s | Yield <sup>b</sup> , mg | Activity, g·mmol <sup>-1</sup> ·h <sup>-1</sup> ·bar[C <sub>2</sub> H <sub>4</sub> ] <sup>-1</sup> | M <sub>w</sub> <sup>c</sup> , kDa | M <sub>n</sub> <sup>c</sup> , kDa | $\bar{D}$ <sup>c</sup> | T <sub>m</sub> <sup>d</sup> , °C | Octene content, wt % |
|----------------|-----------|----------------|-------------------------|----------------------------------------------------------------------------------------------------|-----------------------------------|-----------------------------------|------------------------|----------------------------------|----------------------|
| 1              | <b>7</b>  | 244            | 25                      | 3580                                                                                               | 384                               | 110                               | 3.5                    | 116                              | 7                    |
| 2              | <b>8</b>  | 1800           | 7                       | 160                                                                                                | n.d.                              | n.d.                              | n.d.                   | n.d.                             | n.d.                 |
| 3              | <b>9</b>  | 655            | 19                      | 990                                                                                                | 87                                | 64                                | 1.4                    | 120                              | 8                    |
| 4              | <b>10</b> | 349            | 24                      | 2350                                                                                               | 110                               | 84                                | 1.3                    | 110                              | 10                   |
| 5              | <b>11</b> | 287            | 23                      | 2770                                                                                               | 112                               | 80                                | 1.4                    | 108                              | 12                   |
| 6              | <b>12</b> | 1800           | 19                      | 390                                                                                                | 71                                | 54                                | 1.3                    | 119                              | 8                    |
| 7 <sup>e</sup> | <b>1b</b> | 134            | 60                      | 15600                                                                                              | 402                               | 263                               | 1.5                    | 76                               | 22                   |

<sup>a</sup>Polymerization conditions: 0.04 μmol complexes; 0.04 μmol AB activator; 3.8 mL isohexane; ethylene pressure 75 psi, 0.1 mL 1-octene; 0.3 μmol of (*n*Oct)<sub>3</sub>Al; temperature: 80 °C; 800 rpm stirring speed. <sup>b</sup>Reactor quenched at 10 psig ethylene (quench value, see Supporting Information for details) uptake or at a maximum time limit of 30 minutes. <sup>c</sup>Determined using gel permeation chromatography in 1,2,4-C<sub>6</sub>H<sub>3</sub>Cl<sub>3</sub> at 135 °C vs polystyrene standards. <sup>d</sup>Determined via differential scanning calorimetry. <sup>e</sup>0.02 μmol complex used.

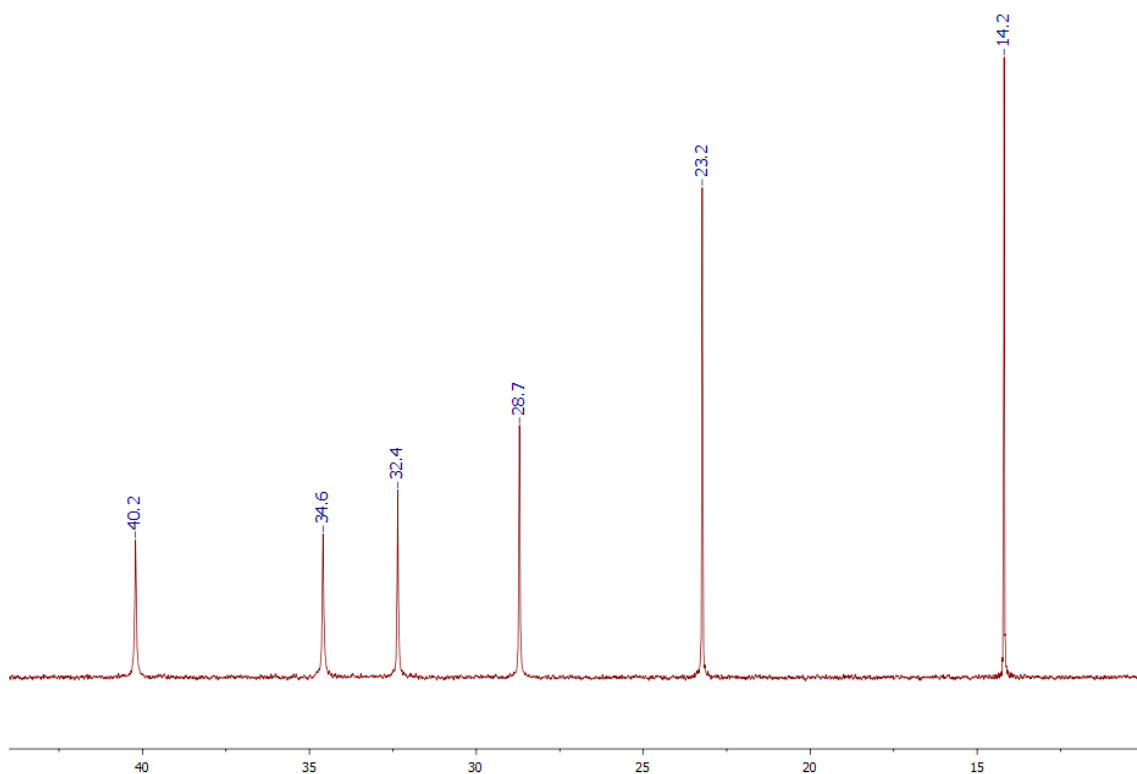

Figure S7. Fragment of  $^{13}\text{C}$  NMR (100 MHz,  $\text{CDCl}_3$ ) spectrum of poly(hexene-1) obtained with 7/AB at room temperature (entry 1, Table S1).

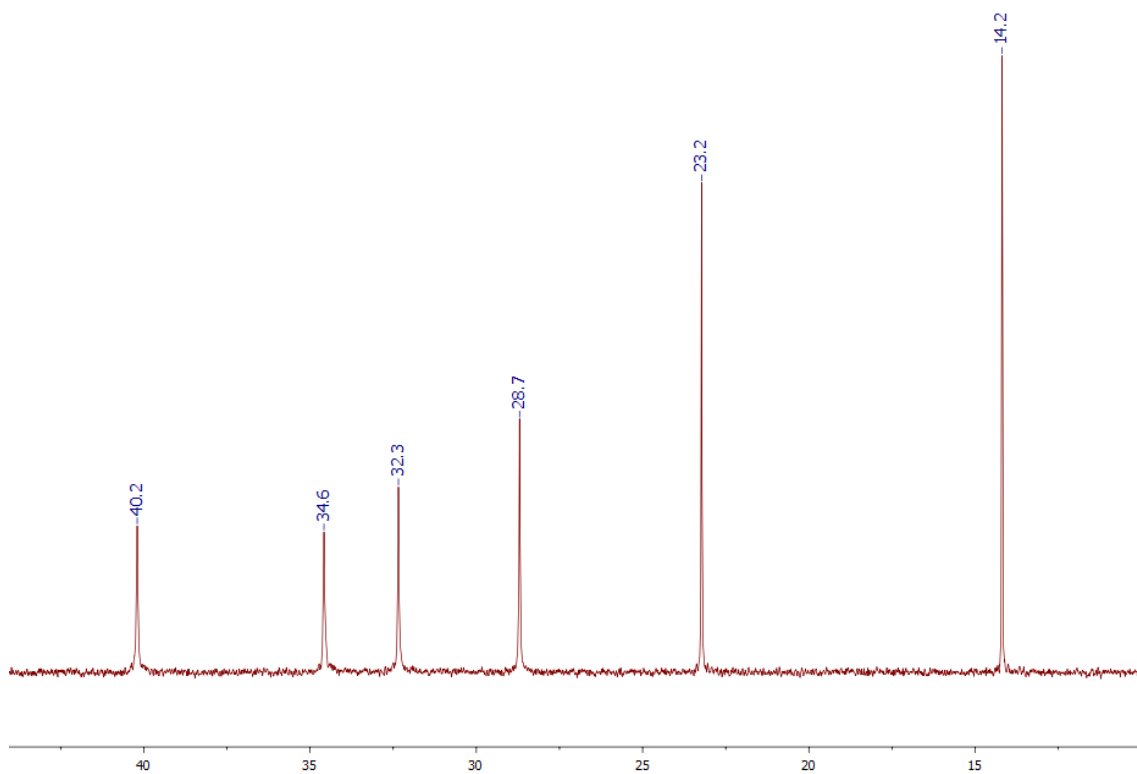

Figure S8. Fragment of  $^{13}\text{C}$  NMR (100 MHz,  $\text{CDCl}_3$ ) spectrum of poly(hexene-1) obtained with 8/AB at room temperature (entry 2, Table S1).

### Crystal structure determinations.

X-ray experiments were carried out using SMART 1000 CCD diffractometer ( $\lambda(\text{Mo-K}\alpha)=0.71073 \text{ \AA}$ , graphite monochromator,  $\omega$ -scans) at 110 °K. All structures were solved by the direct methods and refined by the full-matrix least-squares procedure in anisotropic approximation for non-hydrogen atoms. All the hydrogen atoms were placed in geometrically calculated positions and included in the refinement using riding approximation. The details of data collection and crystal structures refinement for which we used SAINT Plus,<sup>1</sup> SADABS<sup>2</sup> and SHELXTL-97<sup>3</sup> program packages, are summarized in Tables S4 through S7. Crystallographic data for **7**, **8**, **9**, and **11** have been deposited with the Cambridge Crystallographic Data Center, CCDC Nos. 1987153-1987156. Copies of this information may be obtained from the Director, CCDC, 12 Union Road, Cambridge CB2 1EZ, UK (Fax: +44 1223 336033; e-mail: [deposit@ccdc.cam.ac.uk](mailto:deposit@ccdc.cam.ac.uk) or [www.ccdc.cam.ac.uk](http://www.ccdc.cam.ac.uk)).

### References

- [1] *SMART and SAINT, Release 5.0, Area Detector control and Integration Software*, Bruker AXS, Analytical X-Ray Instruments, Madison, Wisconsin, USA, 1998.
- [2] Sheldrick, G.M. *SADABS: A Program for Exploiting the Redundancy of Area-detector X-Ray Data*, University of Göttingen, Göttingen, Germany, 1999.
- [3] Sheldrick, G.M. *SHELXTL-97 Program for Solution and Refinement of Crystal Structure*, Bruker AXS Inc., Madison, WI-53719, USA, 1997.

**Table S4. Crystal data and structure refinement for 7 (CCDC 1987153).**

|                                             |                                                                |
|---------------------------------------------|----------------------------------------------------------------|
| Empirical formula                           | C <sub>39</sub> H <sub>44</sub> HfN <sub>2</sub> Si            |
| Formula weight                              | 747.34                                                         |
| Temperature/K                               | 120                                                            |
| Crystal system                              | monoclinic                                                     |
| Space group                                 | P2 <sub>1</sub> /n                                             |
| a/Å                                         | 17.8250(9)                                                     |
| b/Å                                         | 11.1737(6)                                                     |
| c/Å                                         | 18.7813(9)                                                     |
| α/°                                         | 90                                                             |
| β/°                                         | 115.0910(10)                                                   |
| γ/°                                         | 90                                                             |
| Volume/Å <sup>3</sup>                       | 3387.7(3)                                                      |
| Z                                           | 4                                                              |
| ρ <sub>calc</sub> /g/cm <sup>3</sup>        | 1.465                                                          |
| μ/mm <sup>-1</sup>                          | 3.144                                                          |
| F(000)                                      | 1512.0                                                         |
| Crystal size/mm <sup>3</sup>                | 0.2 × 0.13 × 0.09                                              |
| Radiation                                   | MoKα (λ = 0.71073)                                             |
| 2θ range for data collection/°              | 2.64 to 61.238                                                 |
| Index ranges                                | -25 ≤ h ≤ 25, -15 ≤ k ≤ 16, -26 ≤ l ≤ 26                       |
| Reflections collected                       | 40379                                                          |
| Independent reflections                     | 10427 [R <sub>int</sub> = 0.0398, R <sub>sigma</sub> = 0.0352] |
| Data/restraints/parameters                  | 10427/0/394                                                    |
| Goodness-of-fit on F <sup>2</sup>           | 1.055                                                          |
| Final R indexes [I >= 2σ (I)]               | R <sub>1</sub> = 0.0243, wR <sub>2</sub> = 0.0567              |
| Final R indexes [all data]                  | R <sub>1</sub> = 0.0301, wR <sub>2</sub> = 0.0586              |
| Largest diff. peak/hole / e Å <sup>-3</sup> | 0.78/-1.19                                                     |

**Table S5. Crystal data and structure refinement for 8 (CCDC 1987155).**

|                                   |                                                         |                                          |
|-----------------------------------|---------------------------------------------------------|------------------------------------------|
| Empirical formula                 | C <sub>43</sub> H <sub>46</sub> HfN <sub>2</sub> Si     |                                          |
| Formula weight                    | 797.40                                                  |                                          |
| Temperature                       | 120 K                                                   |                                          |
| Wavelength                        | 0.71073 Å                                               |                                          |
| Crystal system                    | monoclinic                                              |                                          |
| Space group                       | P 1 21/n 1                                              |                                          |
| Unit cell dimensions              | a = 18.805(3) Å<br>b = 11.0536(19) Å<br>c = 19.590(3) Å | α = 90°.<br>β = 116.015(3)°.<br>γ = 90°. |
| Volume                            | 3659.5(11) Å <sup>3</sup>                               |                                          |
| Z                                 | 4                                                       |                                          |
| Density (calculated)              | 1.447 Mg/m <sup>3</sup>                                 |                                          |
| Absorption coefficient            | 2.915 mm <sup>-1</sup>                                  |                                          |
| F(000)                            | 1616                                                    |                                          |
| Crystal size                      | 0.16 x 0.15 x 0.11 mm <sup>3</sup>                      |                                          |
| Theta range for data collection   | 2.003 to 27.000°.                                       |                                          |
| Index ranges                      | -24 ≤ h ≤ 24, -14 ≤ k ≤ 14, -25 ≤ l ≤ 25                |                                          |
| Reflections collected             | 62291                                                   |                                          |
| Independent reflections           | 7973 [R(int) = 0.0384]                                  |                                          |
| Completeness to theta = 25.242°   | 100.0 %                                                 |                                          |
| Absorption correction             | Semi-empirical from equivalents                         |                                          |
| Max. and min. transmission        | 0.7459 and 0.6025                                       |                                          |
| Refinement method                 | Full-matrix least-squares on F <sup>2</sup>             |                                          |
| Data / restraints / parameters    | 7973 / 0 / 430                                          |                                          |
| Goodness-of-fit on F <sup>2</sup> | 1.033                                                   |                                          |
| Final R indices [I > 2σ(I)]       | R1 = 0.0219, wR2 = 0.0492                               |                                          |
| R indices (all data)              | R1 = 0.0283, wR2 = 0.0526                               |                                          |
| Extinction coefficient            | n/a                                                     |                                          |
| Largest diff. peak and hole       | 1.741 and -0.520 e.Å <sup>-3</sup>                      |                                          |

**Table S6. Crystal data and structure refinement for 9 (CCDC 1987154).**

|                                   |                                                            |                                                     |
|-----------------------------------|------------------------------------------------------------|-----------------------------------------------------|
| Empirical formula                 | C <sub>41</sub> H <sub>44</sub> HfN <sub>2</sub> Si        |                                                     |
| Formula weight                    | 771.36                                                     |                                                     |
| Temperature                       | 120 K                                                      |                                                     |
| Wavelength                        | 0.71073 Å                                                  |                                                     |
| Crystal system                    | Triclinic                                                  |                                                     |
| Space group                       | P-1                                                        |                                                     |
| Unit cell dimensions              | a = 10.6765(9) Å<br>b = 11.0521(10) Å<br>c = 15.8719(14) Å | α = 98.919(4)°<br>β = 95.327(4)°<br>γ = 106.367(4)° |
| Volume                            | 1756.7(3) Å <sup>3</sup>                                   |                                                     |
| Z                                 | 2                                                          |                                                     |
| Density (calculated)              | 1.458 Mg/m <sup>3</sup>                                    |                                                     |
| Absorption coefficient            | 3.034 mm <sup>-1</sup>                                     |                                                     |
| F(000)                            | 780                                                        |                                                     |
| Crystal size                      | 0.2 x 0.17 x 0.15 mm <sup>3</sup>                          |                                                     |
| Theta range for data collection   | 1.956 to 26.998°                                           |                                                     |
| Index ranges                      | -13 ≤ h ≤ 13, -14 ≤ k ≤ 14, -20 ≤ l ≤ 20                   |                                                     |
| Reflections collected             | 24355                                                      |                                                     |
| Independent reflections           | 7673 [R(int) = 0.0307]                                     |                                                     |
| Completeness to theta = 25.242°   | 99.9 %                                                     |                                                     |
| Absorption correction             | Semi-empirical from equivalents                            |                                                     |
| Max. and min. transmission        | 0.7459 and 0.5999                                          |                                                     |
| Refinement method                 | Full-matrix least-squares on F <sup>2</sup>                |                                                     |
| Data / restraints / parameters    | 7673 / 0 / 410                                             |                                                     |
| Goodness-of-fit on F <sup>2</sup> | 1.048                                                      |                                                     |
| Final R indices [I > 2σ(I)]       | R1 = 0.0236, wR2 = 0.0531                                  |                                                     |
| R indices (all data)              | R1 = 0.0281, wR2 = 0.0551                                  |                                                     |
| Extinction coefficient            | n/a                                                        |                                                     |
| Largest diff. peak and hole       | 2.224 and -0.626 e. Å <sup>-3</sup>                        |                                                     |

**Table S7. Crystal data and structure refinement for 11 (CCDC 1987156).**

|                                   |                                             |                                 |
|-----------------------------------|---------------------------------------------|---------------------------------|
| Empirical formula                 | $C_{40.50}H_{44}HfN_2Si$                    |                                 |
| Formula weight                    | 765.35                                      |                                 |
| Temperature                       | 120(2) K                                    |                                 |
| Wavelength                        | 0.71073 Å                                   |                                 |
| Crystal system                    | Triclinic                                   |                                 |
| Space group                       | P-1                                         |                                 |
| Unit cell dimensions              | $a = 9.7827(4)$ Å                           | $\alpha = 90.6290(10)^\circ$ .  |
|                                   | $b = 10.8823(5)$ Å                          | $\beta = 92.4150(10)^\circ$ .   |
|                                   | $c = 17.9126(8)$ Å                          | $\gamma = 111.6070(10)^\circ$ . |
| Volume                            | $1770.65(14)$ Å <sup>3</sup>                |                                 |
| Z                                 | 2                                           |                                 |
| Density (calculated)              | 1.436 Mg/m <sup>3</sup>                     |                                 |
| Absorption coefficient            | 3.009 mm <sup>-1</sup>                      |                                 |
| F(000)                            | 774                                         |                                 |
| Crystal size                      | 0.200 x 0.180 x 0.150 mm <sup>3</sup>       |                                 |
| Theta range for data collection   | 2.014 to 30.720°.                           |                                 |
| Index ranges                      | -14 ≤ h ≤ 14, -15 ≤ k ≤ 15, -25 ≤ l ≤ 25    |                                 |
| Reflections collected             | 32021                                       |                                 |
| Independent reflections           | 10982 [R(int) = 0.0244]                     |                                 |
| Completeness to theta = 25.242°   | 99.9 %                                      |                                 |
| Absorption correction             | Semi-empirical from equivalents             |                                 |
| Max. and min. transmission        | 0.2125 and 0.1659                           |                                 |
| Refinement method                 | Full-matrix least-squares on F <sup>2</sup> |                                 |
| Data / restraints / parameters    | 10982 / 1 / 428                             |                                 |
| Goodness-of-fit on F <sup>2</sup> | 1.023                                       |                                 |
| Final R indices [I > 2σ(I)]       | R1 = 0.0228, wR2 = 0.0512                   |                                 |
| R indices (all data)              | R1 = 0.0284, wR2 = 0.0532                   |                                 |
| Extinction coefficient            | n/a                                         |                                 |
| Largest diff. peak and hole       | 1.277 and -0.457 e.Å <sup>-3</sup>          |                                 |
